# Supplementary material
Source: MDPI journal article supplement (https://www.mdpi.com/2072-4292/13/6/1070)
Supplement: s1 [file s1]

# A Novel Framework Based on Mask R-CNN and Histogram Thresholding for Scalable Segmentation of New and Old Rural Buildings

## Supplementary Materials

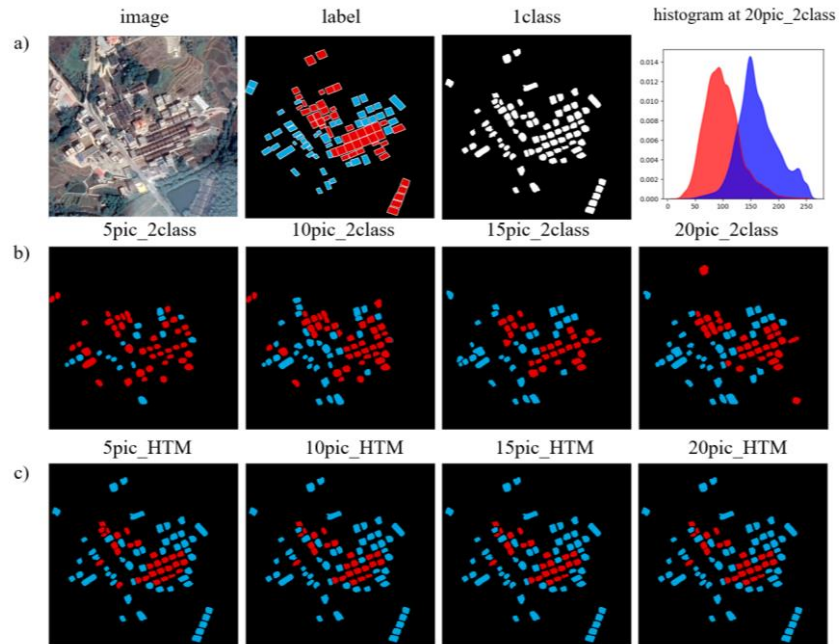

Figure S1: The result comparison of Site 2 between the baseline Mask R-CNN model and the HTMask R-CNN framework. (a) the satellite image from the test set, the second column shows the annotations, the third column shows the result of one-class model (R1), and the fourth column shows the grayscale histograms of the new and old building footprints from R2 when training images = 20. (b) the result of the two-class model (R2), with incremental training samples from 5 to 20. (c) the result of the HTMask R-CNN framework (R3) with incremental training samples.

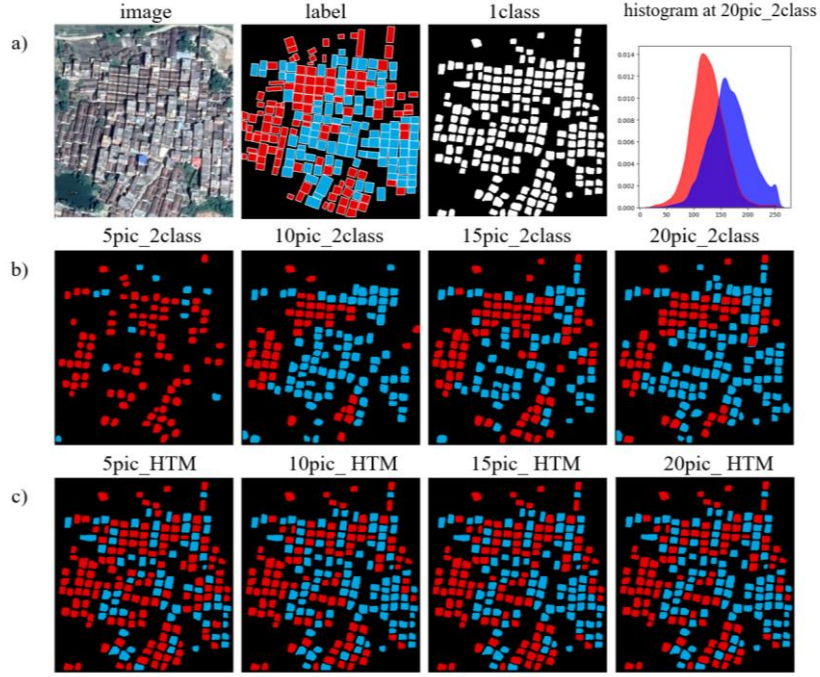

Figure S2: The result comparison of Site 3 between the baseline Mask R-CNN model and the HTMask R-CNN framework. (a) the satellite image from the test set, the second column shows the annotations, the third column shows the result of one-class model R1, and the fourth column shows the grayscale histograms of the new and old building footprints from R2 when training images = 20. (b) the result of the two-class model, R2, with incremental training samples from 5 to 20. (c) the result of the HTMask R-CNN framework R3 with incremental training samples.

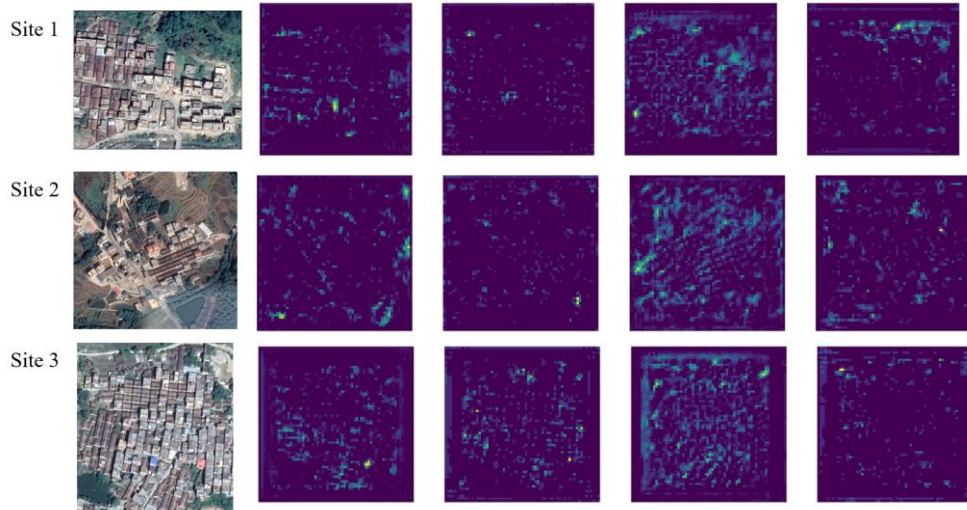

Figure S3: The feature maps of the three sites in the two-class model at the 50th epoch. The first column is the satellite image from the test set. The second to fifth columns show the feature maps of the res4w layer (64 \* 64 \* 1024) of the ResNet101 backbone.

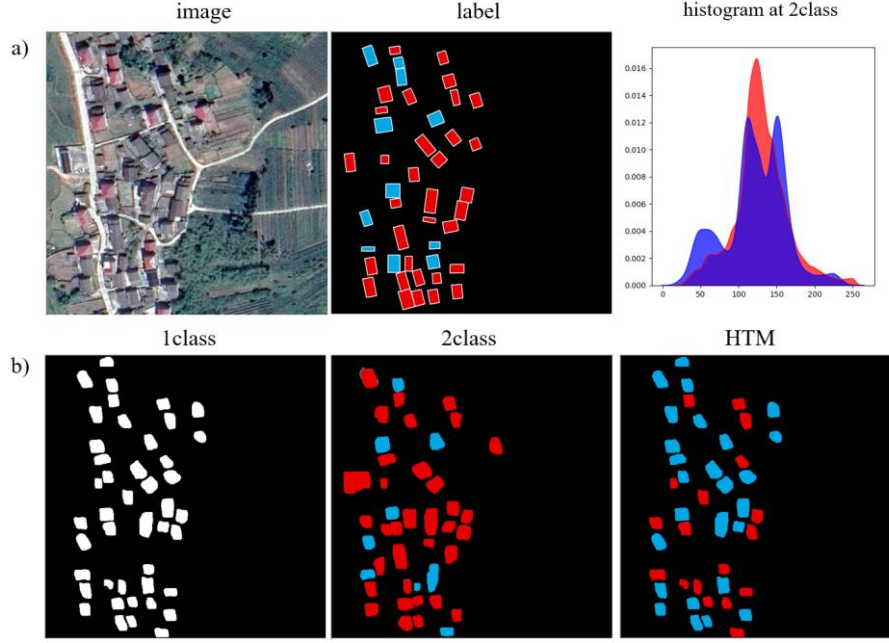

Figure S4: The baseline Mask R-CNN model and the HTMask R-CNN framework were tested in Fuliang County, Jiangxi Province, China. (a) the satellite image from the test set. The second column shows the annotations, and the third column shows the gray distribution of new and old buildings from the two-class model R2. (b) the first column shows the result of the one-class model, R1. The second column shows the result of the two-class model, R2. The third column shows the result of the HTMask R-CNN framework, R3.

Table S1: The  $mAP_{75}$  between R2 and R3 at all levels of training

| models\epoch | 1    | 5    | 10   | 15   | 20   | 25   | 30   | 35   | 40   | 45   | 50   |
|--------------|------|------|------|------|------|------|------|------|------|------|------|
| 5_2class     | 0.00 | 0.00 | 0.00 | 0.00 | 0.03 | 0.01 | 0.01 | 0.02 | 0.02 | 0.02 | 0.02 |
| 5_HTM        | 0.00 | 0.05 | 0.01 | 0.07 | 0.08 | 0.09 | 0.12 | 0.09 | 0.09 | 0.10 | 0.09 |
| 10_2class    | 0.00 | 0.00 | 0.02 | 0.03 | 0.03 | 0.05 | 0.07 | 0.05 | 0.06 | 0.06 | 0.07 |
| 10pic_HTM    | 0.00 | 0.06 | 0.02 | 0.07 | 0.08 | 0.09 | 0.12 | 0.09 | 0.09 | 0.10 | 0.10 |
| 15_2class    | 0.00 | 0.00 | 0.01 | 0.01 | 0.01 | 0.02 | 0.04 | 0.04 | 0.06 | 0.05 | 0.07 |
| 15pic_HTM    | 0.00 | 0.06 | 0.02 | 0.07 | 0.08 | 0.09 | 0.12 | 0.09 | 0.09 | 0.10 | 0.10 |
| 20_2class    | 0.00 | 0.00 | 0.04 | 0.05 | 0.08 | 0.07 | 0.07 | 0.10 | 0.11 | 0.09 | 0.10 |
| 20_HTM       | 0.00 | 0.06 | 0.02 | 0.07 | 0.08 | 0.09 | 0.12 | 0.09 | 0.09 | 0.10 | 0.10 |

Table S2: Tuning hyperparameters.

We used the settings below to tune the hyperparameters.

| Hyperparameters   | Range        | Optimal value |
|-------------------|--------------|---------------|
| Iteration         | 50           | 50            |
| Batch size        | 2            | 2             |
| Learning rate     | [1e-5, 1e-2] | 1e-5          |
| Optimizer         | SGD, Adam    | SGD           |
| Weight decay      | [1e-5, 1e-3] | 1e-4          |
| Learning momentum | [0.7, 0.9]   | 0.9           |

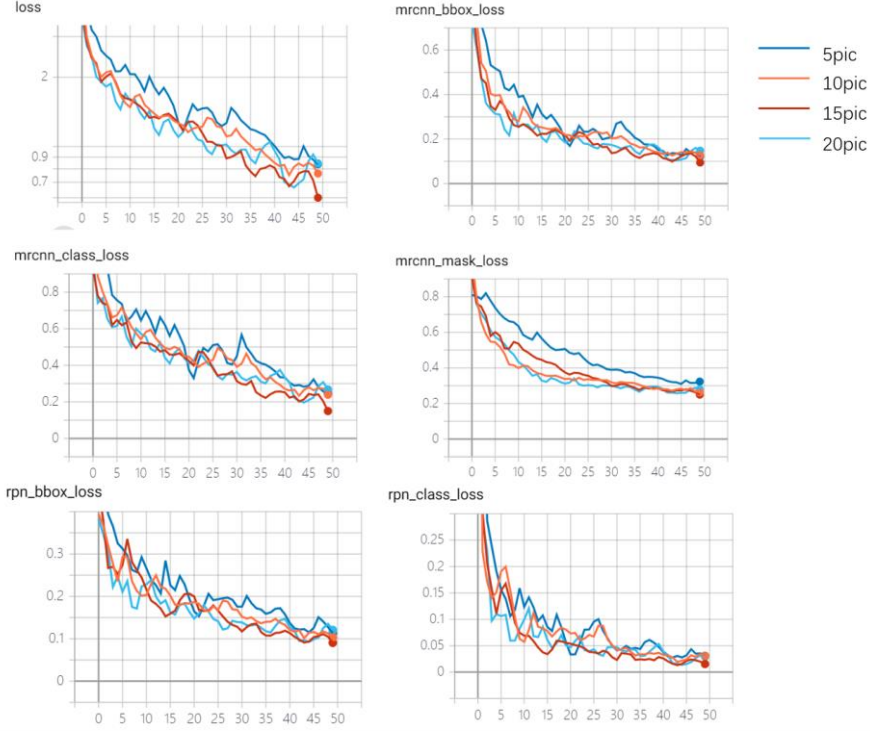

Figure S5: The loss function per training iteration. It shows the multi-task loss, the mrcnn\_bbox\_loss, the mrcnn\_class\_loss, the mrcnn\_mask\_loss, the rpn\_bbox\_loss, and the rpn\_class\_loss.

Equation S1: Loss function of the two-class model R2.

$$L = L_{rpn\_bbox} + L_{rpn\_cls} + L_{cls} + L_{bbox} + L_{mask} \quad (1)$$

Mask R-CNN utilizes a multi-task loss function( $L$ ) that combines the loss of classification, localization and segmentation mask as illustrated in the equation below. We optimized the total loss  $L$  during the training stage. The variable  $L_{rpn\_bbox}$  represents the rpn\_bbox\_loss, the variable  $L_{rpn\_cls}$  represents the rpn\_class\_loss, the variable  $L_{cls}$  represents the mrcnn\_class\_loss, the variable  $L_{bbox}$  represents the mrcnn\_bbox\_loss, the variable  $L_{mask}$  represents the mrcnn\_mask\_loss.
